# Supplementary material for: Ultrasensitive Ti3C2Tx@Pt-Based Immunochromatography with Catalytic Amplification and a Dual Signal for the Detection of Chloramphenicol in Animal-Derived Foods
Source: MDPI journal article supplement (doi:10.3390/foods13091416), 2024-05-05
Supplement: s1 [file s1]

## Supplementary Material

# Ultrasensitive Ti<sub>3</sub>C<sub>2</sub>Tx@Pt-Based Immunochromatography with Catalytic Amplification and a Dual Signal for the Detection of Chloramphenicol in Animal-Derived Foods

Mengfang Lin 1,†, Zhimin Gao 2,†, Zhenjie Qian 3, Youwen Deng 1, Yanhong Chen 3, Yu Wang 3,\*  
and Xiangmei Li 1,\*

<sup>1</sup> Guangdong Provincial Key Laboratory of Food Quality and Safety, College of Food Science, South China Agricultural University, Guangzhou 510642, China; 15978008477@163.com (M.L.); d635921341@163.com (Y.D.)

<sup>2</sup> Guangdong Agricultural Product Quality and Safety Center (Guangdong Green Food Development Center), Guangzhou 510230, China; 18922147530@163.com

<sup>3</sup> Guangzhou Institute for Food Inspection, Guangzhou 511410, China; qianzhenjie@hotmail.com (Z.Q.); chenyanhom@outlook.com (Y.C.)

\* Correspondence: xxwangyu@163.com (Y.W.); lixiangmei12@163.com (X.L.); Tel.: +86-20-8528-3925 (Y.W. & X.L.)

† These authors contributed equally to this work.

## LC-MS/MS analysis

The sample preparation method of LC-MS/MS was as follows: the samples (2 g) were extracted with 10 mL of ethyl acetate (containing 0.6 mL of ammonia and 5 mL of 4% NaCl) for 10 min. The supernatants were centrifuged at 6800×g for 3 min. The supernatant was transferred to a 15 mL centrifuge tube for nitrogen blowing. After drying, 2 mL of ultrapure water and 3 mL of n-hexane were added and thoroughly mixed, and then centrifuged at 6800×g for 3 min to remove fat from the sample. Subsequently, the supernatant was purified through a syringe filter (0.22 μm).

LC-MS/MS analysis was performed in multiple reaction monitoring (MRM) mode on a Shimadzu (Nexera x2, Japan) LC system coupled with an AB Sciex triple quadrupole EMR (QTRAP®4500, USA). Chromatographic separation was performed on an Agilent C18 column (InfinityLab Poroshell 120 EC-C18, 100 mm\*3 mm 2.6-Micron), and the column temperature was maintained at 40°C. The mobile phase was constituted of H<sub>2</sub>O (mobile phase A) and 100% acetonitrile (mobile phase B). The gradient elution procedure was as follows: 0-1 min, 20% B; 1-3 min, 20%-50% B; 3-6 min, 50%-65% B; 7-7.1 min, 65%-20% B. The mobile phase flow rate was 300 μL/min; the injection volume of the sample was 2 μL. The condition of mass spectrometer was as follows: ion mode, negative ionization; ion source, electrospray ionization (ESI); temperature, 500°C; curtain gas, 35 psi; ion source gas 1, 55 psi; ion source gas 2, 55 psi;

collision gas (CAD), medium; ion spray voltage, -4500 V. MS acquisition was performed using multiple reaction monitoring (MRM) mode, and the MRM parameters included MRM transition 321.1/152.1\* and 321.1/257.1 (m/z, \*Quantitative ion pair), declustering potential both -70 V, and collision energy -24.1 and -16.1 eV, respectively.

## Figure captions

**Figure S1** XRD spectra of  $\text{Ti}_3\text{AlC}_2$ .

**Figure S2** The optimization of  $\text{Ti}_3\text{C}_2\text{Tx@Pt}$  synthesis: (A) the amount of  $\text{H}_2\text{PtCl}_6 \cdot 6\text{H}_2\text{O}$ , (B) the synthesis time of  $\text{Ti}_3\text{C}_2\text{Tx@Pt}$ , (C) the amount of reductant.

**Figure S3** Steady-state kinetic assay of  $\text{Ti}_3\text{C}_2\text{Tx@Pt}$ : (A) the double reciprocal plots between reaction velocity and TMB concentration, (B) the TMB concentration dependence of initial reaction velocity ( $v$ ).

**Figure S4** Correlation analysis between  $\text{Ti}_3\text{C}_2\text{Tx@Pt}$ -ICA and LC-MS/MS.

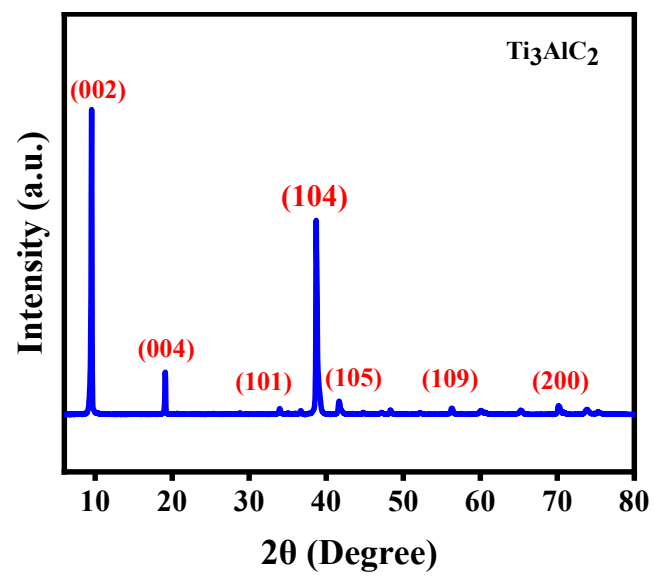

Figure S1

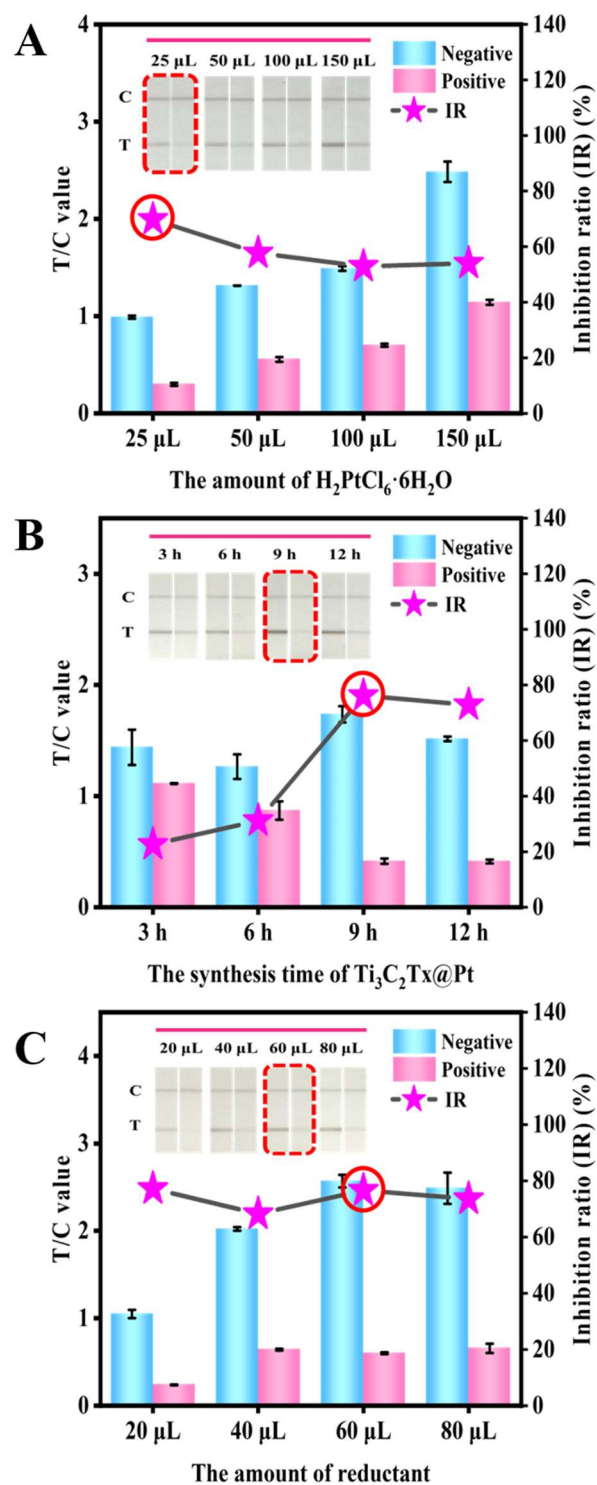

Figure S2

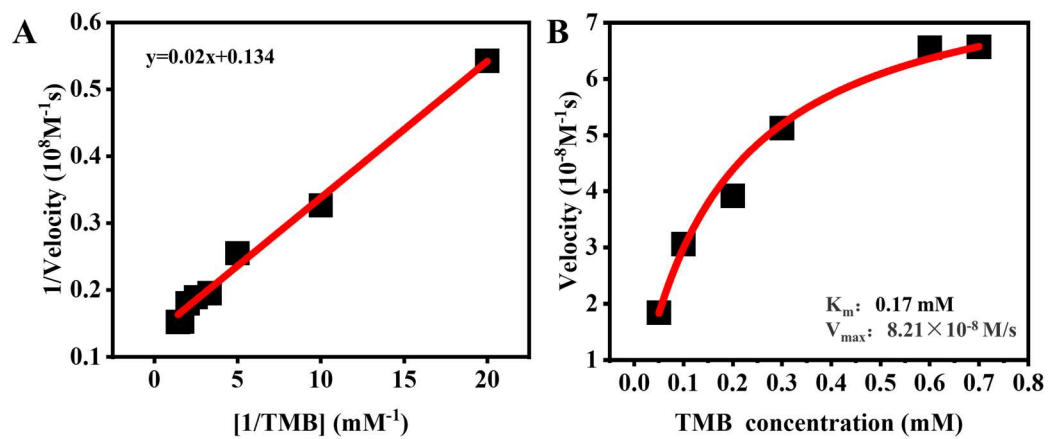

**Figure S3**

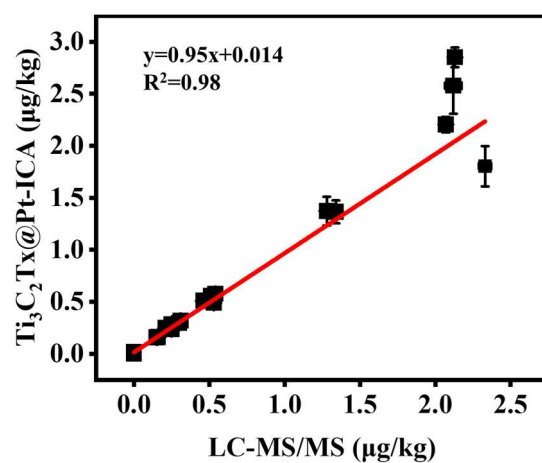

Figure S4



1 **Table S1** Comparison of the  $K_m$  and  $V_{max}$  of different enzymes

| Enzyme or<br>enzyme mimic            | $K_m$ (mM) | $V_{max}$ ( $10^{-8}Ms^{-1}$ ) | Reference        |
|--------------------------------------|------------|--------------------------------|------------------|
| TMB                                  |            |                                |                  |
| HRP                                  | 0.43       | 10.00                          | [25]             |
| Pt-Ir                                | 7.01       | 10.7                           | [26]             |
| PtNPs/GO                             | 0.19       | 10.2                           | [27]             |
| Ptn-JP NCs                           | 0.719      | 51.33                          | [28]             |
| Pt/PCN                               | 1.06       | 23.12                          | [29]             |
| Ag-Pt/rGO                            | 3.24       | 20                             | [30]             |
| Au@Pt                                | 2.431      | 4.425                          | [31]             |
| Pt NPs                               | 0.12       | 126                            | [32]             |
| Pd@Pt                                | 0.516      | 72.1                           | [33]             |
| Ps-Pt                                | 0.3742     | -                              | [34]             |
| BP-Pt                                | 0.27       | 13.72                          | [35]             |
| FNA-Ag@Pt                            | 1.8        | 7030                           | [36]             |
| Ti <sub>3</sub> C <sub>2</sub> Tx@Pt | 0.17       | 8.21                           | <b>This work</b> |

2 -: unavailable or undetectable.

3 **Table S2** The IC<sub>50</sub> and CR values of icELISA and Ti<sub>3</sub>C<sub>2</sub>Tx@Pt-ICA (n=3)

| Analytes | Structural formula                                                                  | icELISA                  |        | Ti <sub>3</sub> C <sub>2</sub> Tx@Pt-ICA |        |
|----------|-------------------------------------------------------------------------------------|--------------------------|--------|------------------------------------------|--------|
|          |                                                                                     | IC <sub>50</sub> (μg/kg) | CR (%) | IC <sub>50</sub> (μg/kg)                 | CR (%) |
| CAP      | 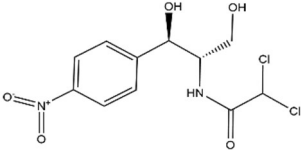   | 0.089                    | 100.0  | 0.074                                    | 100.0  |
| CAPSS    |    | 0.060                    | 148.3  | 0.046                                    | 160.8  |
| TAP      |    | >1000                    | <0.01  | > 1000                                   | < 0.01 |
| FF       |   | >1000                    | <0.01  | > 1000                                   | < 0.01 |
| FFA      |  | >1000                    | <0.01  | > 1000                                   | < 0.01 |

5 **Table S3** Recovery of the  $\text{Ti}_3\text{C}_2\text{Tx}@ \text{Pt}$ -ICA for the detection of CAP in milk, chicken, and fish samples (n=3)

| Sample  | Spiked level ( $\mu\text{g/kg}$ )<br>(Colorimetric signal) | Detected level<br>( $\mu\text{g/kg}$ ) | Recovery<br>(%) | CV<br>(%) | Spiked level ( $\mu\text{g/kg}$ )<br>(Catalytic signal) | Detected level<br>( $\mu\text{g/kg}$ ) | Recovery<br>(%) | CV<br>(%) |
|---------|------------------------------------------------------------|----------------------------------------|-----------------|-----------|---------------------------------------------------------|----------------------------------------|-----------------|-----------|
| Milk    | 0.03                                                       | 0.02 $\pm$ 0.002                       | 80.5            | 7.4       | 0.18                                                    | 0.16 $\pm$ 0.02                        | 89.9            | 13.5      |
|         | 0.05                                                       | 0.04 $\pm$ 0.001                       | 90.0            | 3.1       | 0.36                                                    | 0.29 $\pm$ 0.01                        | 82.9            | 4.1       |
|         | 0.26                                                       | 0.30 $\pm$ 0.095                       | 117.0           | 9.6       | 1.80                                                    | 1.90 $\pm$ 0.19                        | 104.4           | 10.5      |
| Chicken | 0.03                                                       | 0.02 $\pm$ 0.003                       | 87.2            | 12.7      | 0.16                                                    | 0.13 $\pm$ 0.01                        | 83.7            | 3.8       |
|         | 0.05                                                       | 0.06 $\pm$ 0.006                       | 109.6           | 10.6      | 0.32                                                    | 0.27 $\pm$ 0.02                        | 85.9            | 7.1       |
|         | 0.27                                                       | 0.32 $\pm$ 0.019                       | 118.1           | 6.0       | 1.60                                                    | 1.56 $\pm$ 0.24                        | 97.9            | 15.7      |
| Fish    | 0.02                                                       | 0.02 $\pm$ 0.002                       | 92.7            | 10.9      | 0.15                                                    | 0.12 $\pm$ 0.01                        | 82.3            | 4.9       |
|         | 0.04                                                       | 0.05 $\pm$ 0.002                       | 117.9           | 6.0       | 0.30                                                    | 0.25 $\pm$ 0.09                        | 85.8            | 9.2       |
|         | 0.20                                                       | 0.21 $\pm$ 0.029                       | 109.1           | 13.6      | 1.50                                                    | 1.29 $\pm$ 0.17                        | 86.1            | 12.9      |

## References

25. Gao, L.; Zhuang, J.; Nie, L.; Zhang, J.; Zhang, Y.; Gu, N. Intrinsic peroxidase-like activity of ferromagnetic nanoparticles. *Nat. Nanotechnol.* **2007**, *2*, 577-83. <https://doi.org/10.1038/nnano.2007.260>.
26. Yang, H.; He, Q.; Pan, J.; Shen, D.; Xiao, H.; Cui, X. A Pt–Ir nanocube amplified lateral flow immunoassay for dehydroepiandrosterone. *Analyst* **2021**, *146*, 2726-33. <https://doi.org/10.1039/D0AN02293D>.
27. Zhang, L.; Deng, H.; Lin, F.; Xu, X.; Weng, S. A. Liu. In situ growth of porous platinum nanoparticles on graphene oxide for colorimetric detection of cancer cells. *Anal. Chem.* **2014**, *86*, 2711-8. <https://doi.org/10.1021/ac404104j>.
28. Guo, X.; Suo, Y.; Zhang, X.; Cui, Y.; Chen, S.; Sun, H. Ultra-small biocompatible jujube polysaccharide stabilized platinum nanoclusters for glucose detection. *Analyst* **2019**, *144*, 5179-85. <https://doi.org/10.1039/C9AN01053J>.
29. Shi, W.; Fan, H.; Ai, S.; Zhu, L. Honeycomb-like nitrogen-doped porous carbon supporting Pt nanoparticles as enzyme mimic for colorimetric detection of cholesterol. *Sens. Actuators, B* **2015**, *221*, 1515-22. <https://doi.org/10.1016/j.snb.2015.06.157>.
30. Kong, F.; Li, R.; Zhang, S.; Wang, Z.; Li, H.; Fang, H. Nitrogen and sulfur co-doped reduced graphene oxide-gold nanoparticle composites for electrochemical sensing of rutin. *Microchem. J.* **2021**, *160*, 105684. <https://doi.org/10.1016/j.microc.2020.105684>.
31. Wei, D.; Zhang, X.; Chen, B.; Zeng, K. Using bimetallic Au@Pt nanozymes as a visual tag and as an enzyme mimic in enhanced sensitive lateral-flow immunoassays: Application for the detection of streptomycin. *Anal. Chim. Acta.* **2020**, *1126*, 106-13. <https://doi.org/10.1016/j.aca.2020.06.009>.
32. Gao, Z.; Xu, M.; Hou, L.; Chen, G.; Tang, D. Magnetic bead-based reverse colorimetric immunoassay strategy for sensing biomolecules. *Anal. Chem.* **2013**, *85*, 6945-52. <https://doi.org/10.1021/ac401433p>.
33. Wang, X.; Zhang, M.; Pang, X.; Huang, K.; Yao, Z.; Mei, X. Comparative study of Pd@Pt nanozyme improved colorimetric N-ELISA for the paper-output portable detection of *Staphylococcus aureus*. *Talanta* **2022**, *247*, 123503. <https://doi.org/10.1016/j.talanta.2022.123503>.
34. Hu, J.; Tang, F.; Wang, L.; Tang, M.; Jiang, Y.; Liu, C. Nanozyme sensor based-on platinum-decorated polymer nanosphere for rapid and sensitive detection of *Salmonella typhimurium* with the naked eye. *Sens. Actuators, B* **2021**, *346*, 130560. <https://doi.org/10.1016/j.snb.2021.130560>.
35. Li, S.; Wen, W.; Guo, J.; Wang, S.; Wang, J. Development of non-enzymatic and photothermal immuno-sensing assay for detecting the enrofloxacin in animal derived food by utilizing black phosphorus-platinum two-dimensional nanomaterials. *Food Chem.* **2021**, *357*, 129766. <https://doi.org/10.1016/j.foodchem.2021.129766>.
36. Du, Z.; Zhu, L.; Wang, P.; Lan, X.; Lin, S.; Xu, W. Coordination-driven one-step

rapid self-assembly synthesis of dual-functional Ag@Pt nanozyme. *Small* **2023**, *19*, 2301048. <https://doi.org/10.1002/sml.202301048>.
